# Supplementary material
Source: Springer Nature journal article supplement (https://www.springermedizin.de/resource/supplementary/12879_2011_1699_MOESM13_ESM.pdf/9443266)
Supplement: MOESM13 [file 9443266]

Number of times entered

12  
10  
8  
6  
4  
2  
0

**Rv2032**

**ESAT-6**

**ESAT6/CFP10**

**Rv1733c**

**Rv2662**

**Rv1736c-C**

**Rv1737c**

**Rv0081**

**Rv1997c**

**Rv1735c**

**PHA**
